# Supplementary material for: Protealysin Targets the Bacterial Housekeeping Proteins FtsZ and RecA
Source: MDPI journal article supplement (doi:10.3390/ijms231810787), 2022-09-15
Supplement: s1 [file s1]

# Supplementary S1. Alignment of the FtsZ amino acid sequence.

|                   | 1                                                                                                     | 10  | 20  | 30  | 40  | 50  | 60  | 70  | 80  | 90  | 100 |
|-------------------|-------------------------------------------------------------------------------------------------------|-----|-----|-----|-----|-----|-----|-----|-----|-----|-----|
| S. proteanaculans | MFEPHMLTNDVYIKVIGVGGGGNAYEHMVRERIEGVFFAYNTDAAALRKTAVGQTIQIGSGITKGLGAGANPEVGRNSAEEDREALRAALDGADMY      |     |     |     |     |     |     |     |     |     |     |
| E. coli           | MFEPHMLTNDVYIKVIGVGGGGNAYEHMVRERIEGVFFAYNTDAAALRKTAVGQTIQIGSGITKGLGAGANPEVGRNAEDRDALRAALEGADMY        |     |     |     |     |     |     |     |     |     |     |
| A. laidlawii      | MVFGEFNDKPVYIKVIGVGGGGNAYNRHENDVRGVSVAHNTDAAALRKTAVGQTIQIGSGITKGLGAGANPEVGRNAEDRDALRAALEGADMY         |     |     |     |     |     |     |     |     |     |     |
| Consensus         | ..nfepnELt#daYIKVIGVGGGGnAY#hM!r#r!eGve%FAvNTDAAALrktavg#t.IQIGsgitKGLGAGANPe!Gr#AALEdrDaLRaalsgADMY  |     |     |     |     |     |     |     |     |     |     |
|                   | 101                                                                                                   | 110 | 120 | 130 | 140 | 150 | 160 | 170 | 180 | 190 | 200 |
| S. proteanaculans | FIRAGMGGGTGTGAAPVVAEVAKDLGILTVAVYTKPFNFEGKKRMFAEQGIAELSKHVDSLITIPNDKLLKVLGRGISLLDAFGAANDVYKGA VQGIAE  |     |     |     |     |     |     |     |     |     |     |
| E. coli           | FIRAGMGGGTGTGAAPVVAEVAKDLGILTVAVYTKPFNFEGKKRMFAEQGITELSKHVDSLITIPNDKLLKVLGRGISLLDAFGAANDVYKGA VQGIAE  |     |     |     |     |     |     |     |     |     |     |
| A. laidlawii      | FITAGMGGGTGTGAAPVVAEVAKDLGILTVAVYTKPFNFEGPLRMQAITGLEELKPNVDLTIVIPNERLFSIADRDHQLLDFAFRESOKVLRQGVQGI AE |     |     |     |     |     |     |     |     |     |     |
| Consensus         | FIRAGMGGGTGTGAAPVVAE!AK#LG!LT!a!YTKPFNFEGkkRMafaeqGieELskhVDSLtIPN#kLk!lgRgisLLDAFgaa#dVlkgavQGI AE   |     |     |     |     |     |     |     |     |     |     |
|                   | 201                                                                                                   | 210 | 220 | 230 | 240 | 250 | 260 | 270 | 280 | 290 | 300 |
| S. proteanaculans | LITRPGLMNVDFADYRTVMSEMGYAMHSGVACGEDRAEEAEMAISSPLLEDIDL SGARGVLYNITAGFDLRLDEFETVGNIRAFASDNATVYIGTSL    |     |     |     |     |     |     |     |     |     |     |
| E. coli           | LITRPGLMNVDFADYRTVMSEMGYAMHSGVACGEDRAEEAEMAISSPLLEDIDL SGARGVLYNITAGFDLRLDEFETVGNIRAFASDNATVYIGTSL    |     |     |     |     |     |     |     |     |     |     |
| A. laidlawii      | LITRPGLMNVDFADYRTVMSEMGYAMHSGVACGEDRAEEAEMAISSPLLEDIDL SGARGVLYNITAGFDLRLDEFETVGNIRAFASDNATVYIGTSL    |     |     |     |     |     |     |     |     |     |     |
| Consensus         | LITrPG#nNVDFADYRTVMs#nGyA\$MGS GvASGE#RAeEAAEnAISpLLEd!dlsGArgvLYNItaGf#lRdEfEtvgntIRafasd#atv!iGtsl  |     |     |     |     |     |     |     |     |     |     |
|                   | 301                                                                                                   | 310 | 320 | 330 | 340 | 350 | 360 | 370 | 380 | 388 |     |
| S. proteanaculans | DPEHNDLRVTYVATGIGMD-KRPEITLVTNKQV-SQPVMDHRYQQHGMSPLPQEVKPAKVVYNDPTAQPNKEPDYLDIPAFRLKQAD               |     |     |     |     |     |     |     |     |     |     |
| E. coli           | DPEHNDLRVTYVATGIGMD-KRPEITLVTNKQV-SQPVMDHRYQQHGMSPLPQEVKPAKVVYNDPTAQPNKEPDYLDIPAFRLKQAD               |     |     |     |     |     |     |     |     |     |     |
| A. laidlawii      | SVPLEDEMIYTIYATGYELRAKGNEVEKIAGDIFRNSTQQYKITDTGLEPLNNKEASGEDTKKRTLPSMLHRK                             |     |     |     |     |     |     |     |     |     |     |
| Consensus         | dpD\$#DE\$rVT!VATGig\$d.KrpE!tL!tnkqf.##pvn#vryq#hG\$ePLN#e#kpgakvvndtLPqulkepdyl dipaflrkqad         |     |     |     |     |     |     |     |     |     |     |

High consensus (60%) is highlighted in red. Low consensus (30%) is highlighted in blue. Neutral is highlighted in black. Consensus symbols: “!” = IV, “\$” = LM, “%” = FY, “#” = NDQEBZ. The Multalin version 5.4.1 was used to build a consensus sequence.

**Supplementary S2. Examples of mass spectra.**

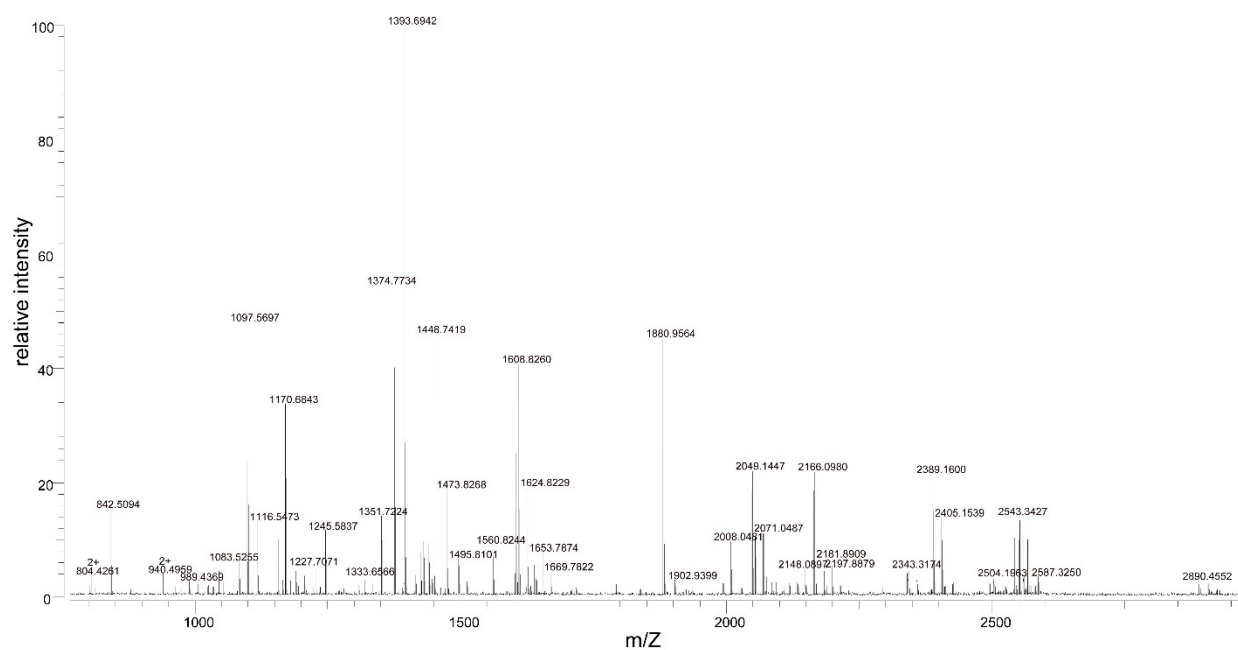

Spectrum of uncleaved *E. coli* FtsZ.

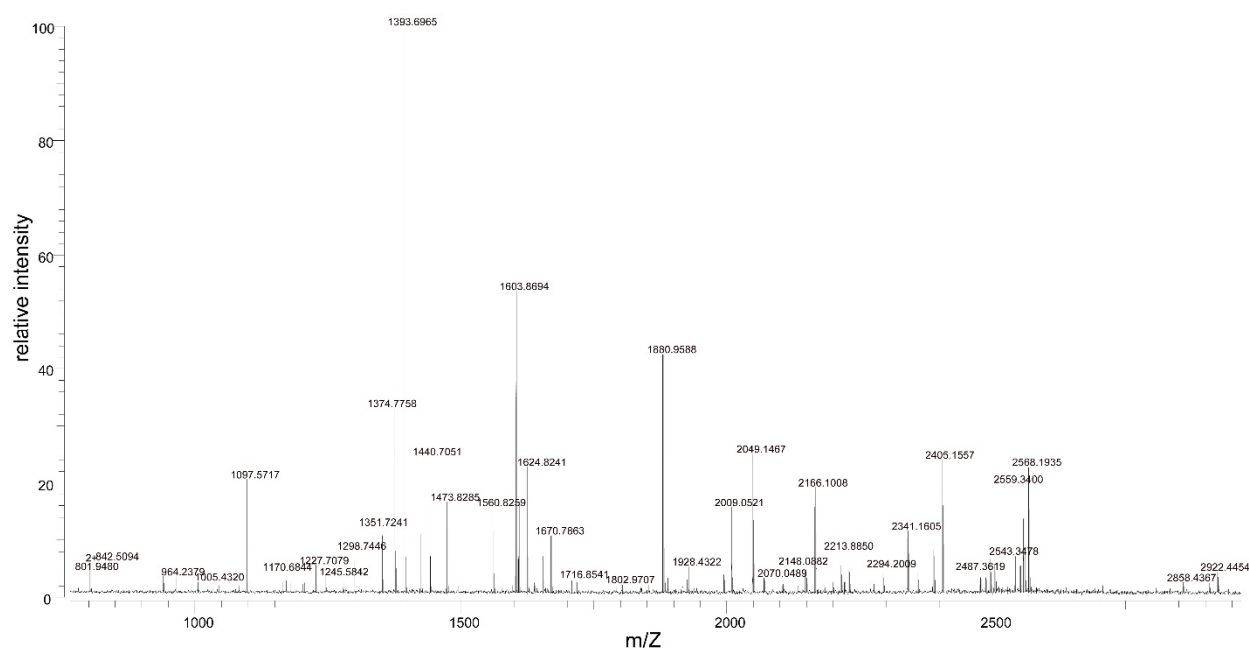

Spectrum of *E. coli* FtsZ cleaved by a protealysin.  
Full mass range.

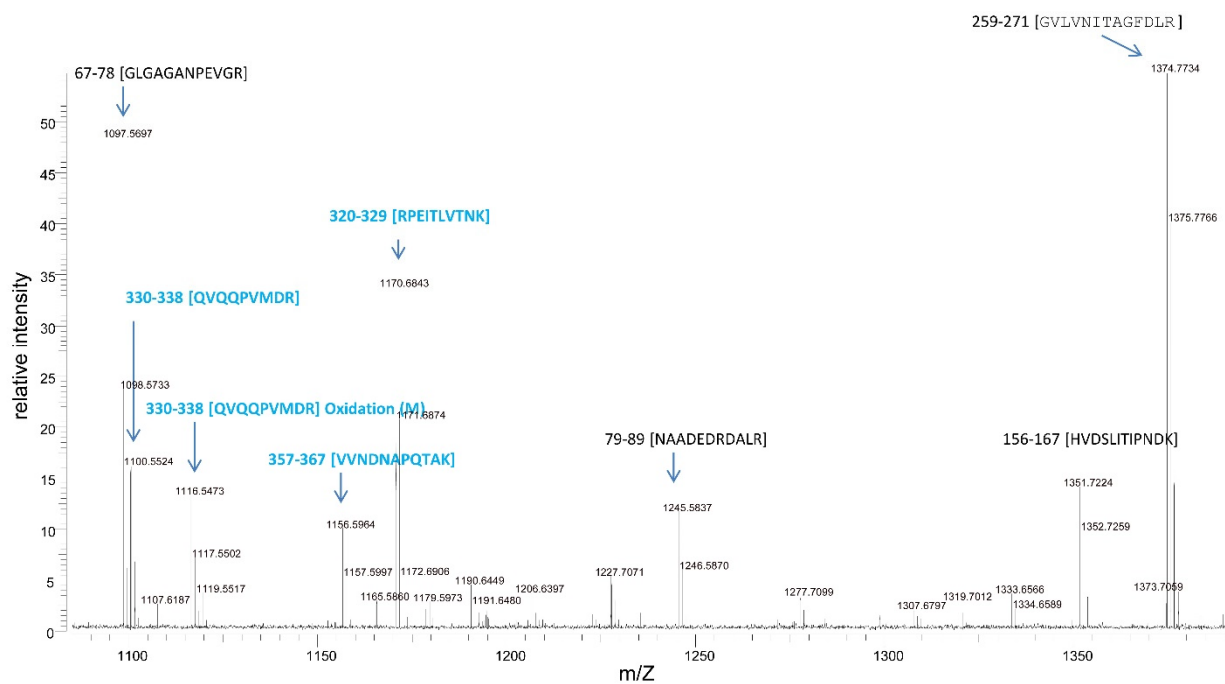

Spectrum of uncleaved *E. coli* FtsZ.

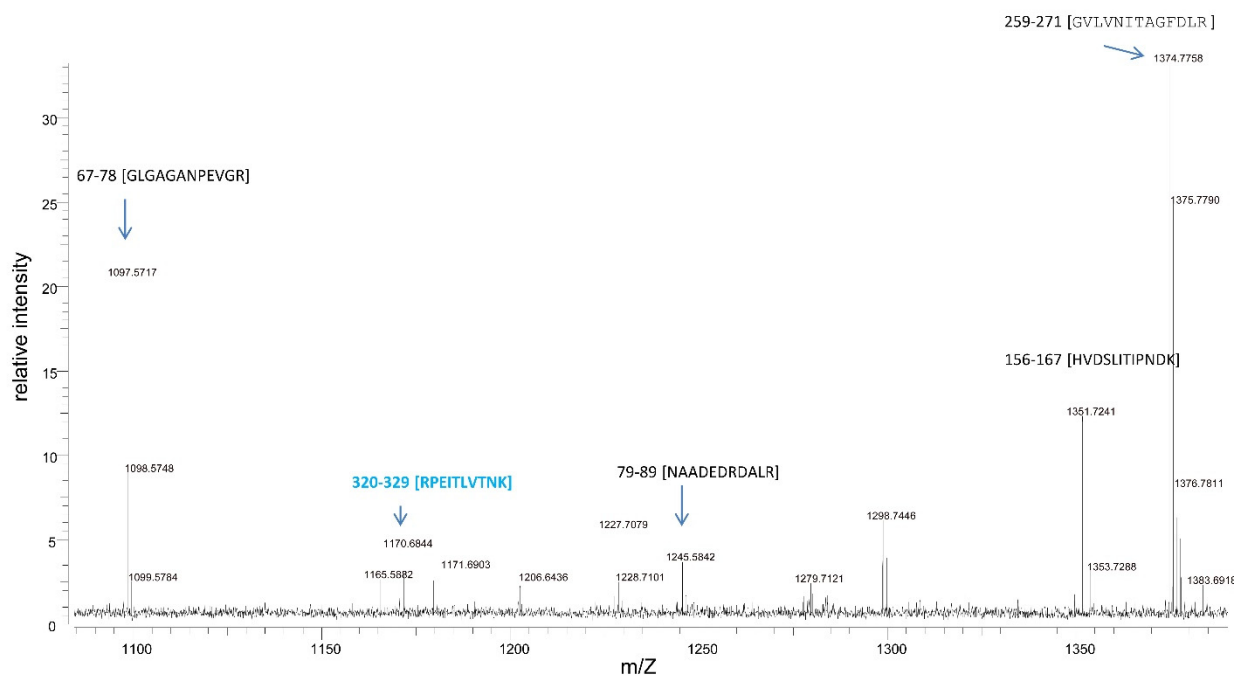

Spectrum of *E. coli* FtsZ cleaved by a protealysin.

The spectra are shown with the selected mass range, in which the peaks of the cleaved protein disappear from the spectrum or the intensity of which is greatly reduced. Their corresponding peptides are marked in blue.

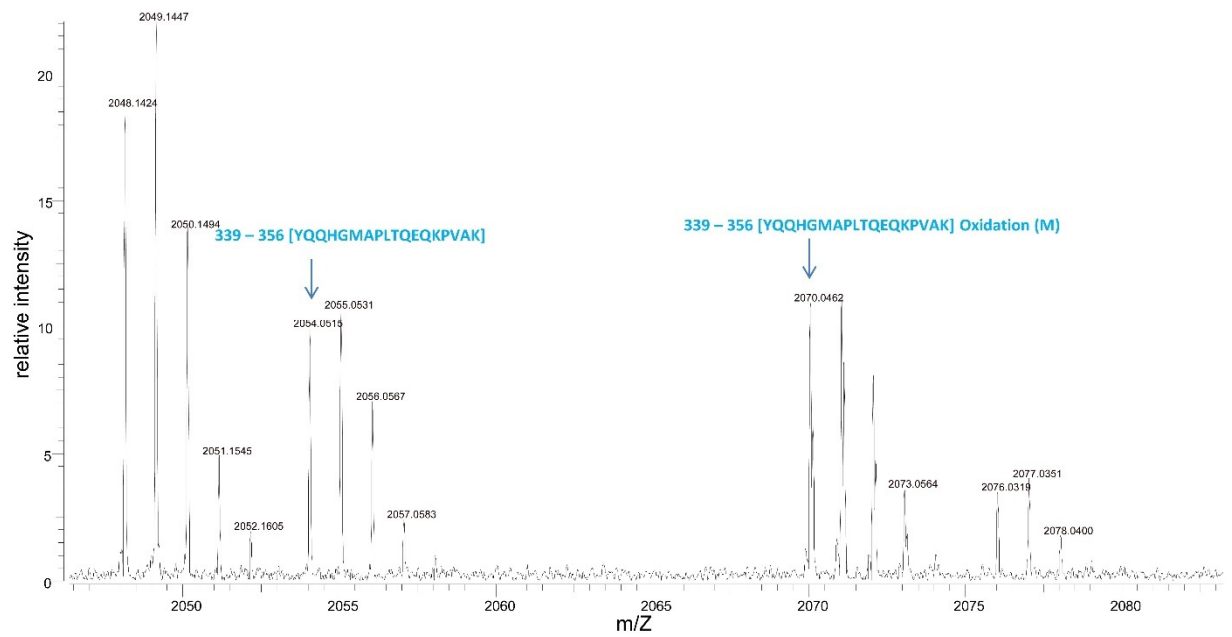

Spectrum of uncleaved *E. coli* FtsZ.

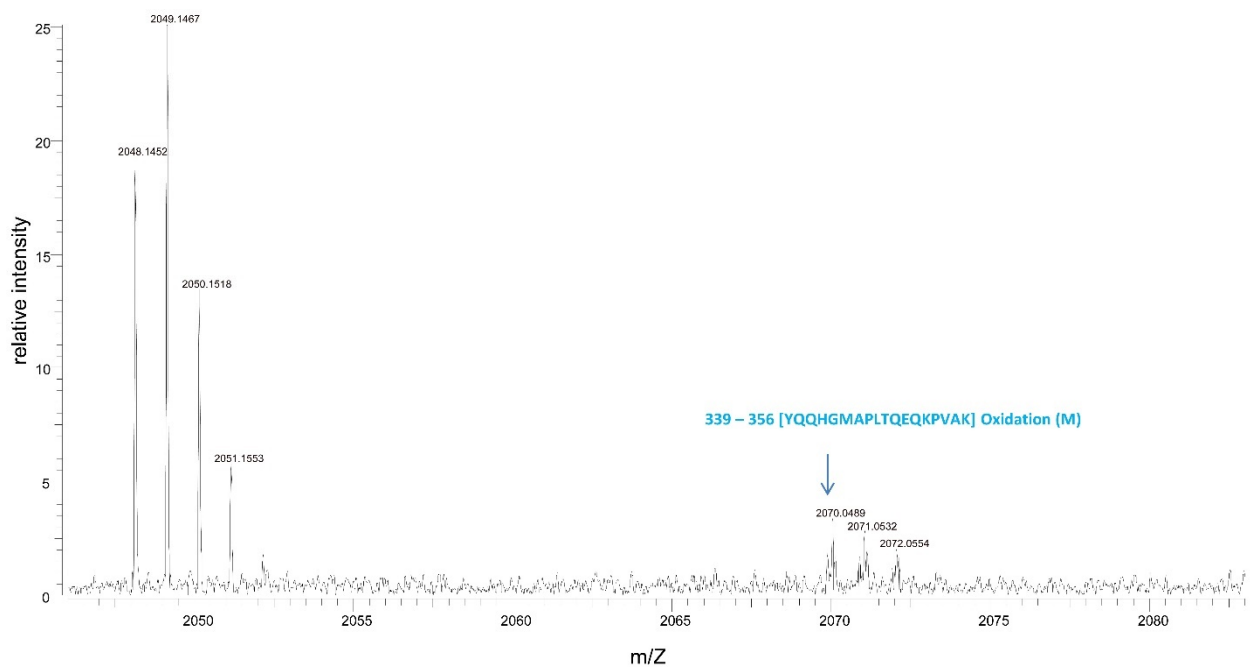

Spectrum of *E. coli* FtsZ cleaved by a proteolysin.

The spectra are shown with the selected mass range, in which the peaks of the cleaved protein disappear from the spectrum or the intensity of which is greatly reduced. Their corresponding peptides are marked in blue.

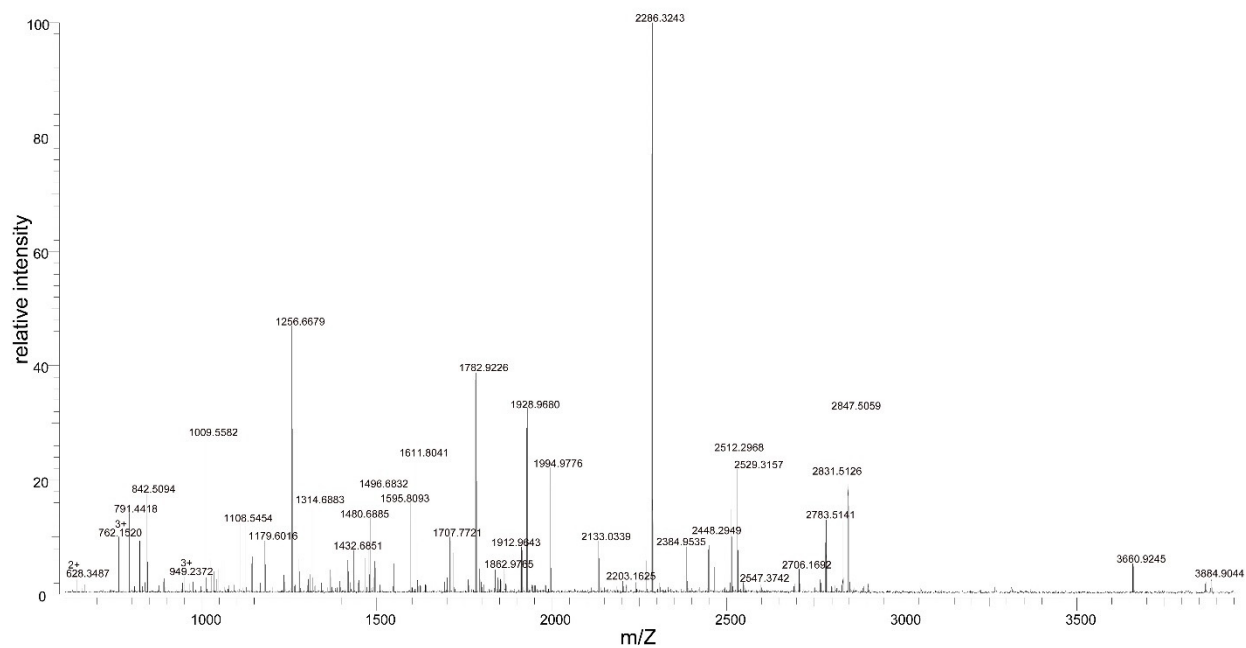

Spectrum of uncleaved *A. laidlawii* FtsZ.

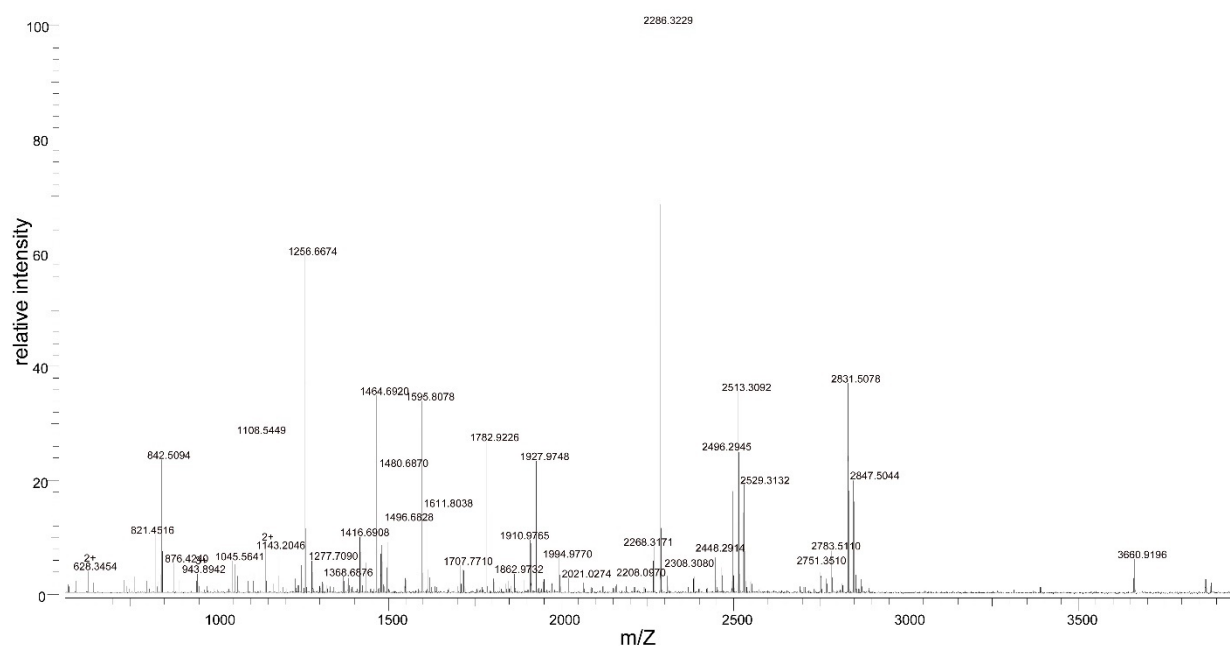

Spectrum of *A. laidlawii* FtsZ cleaved by a protealysin.  
Full mass range.

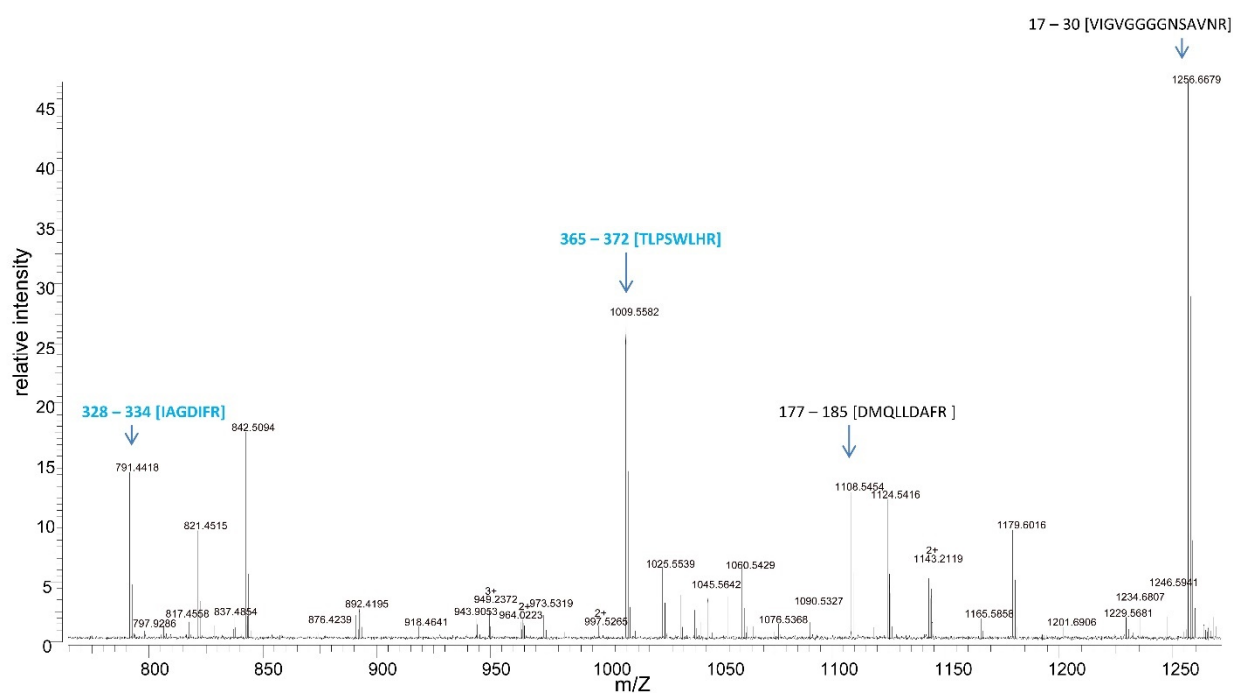

Spectrum of uncleaved *A. laidlawii* FtsZ.

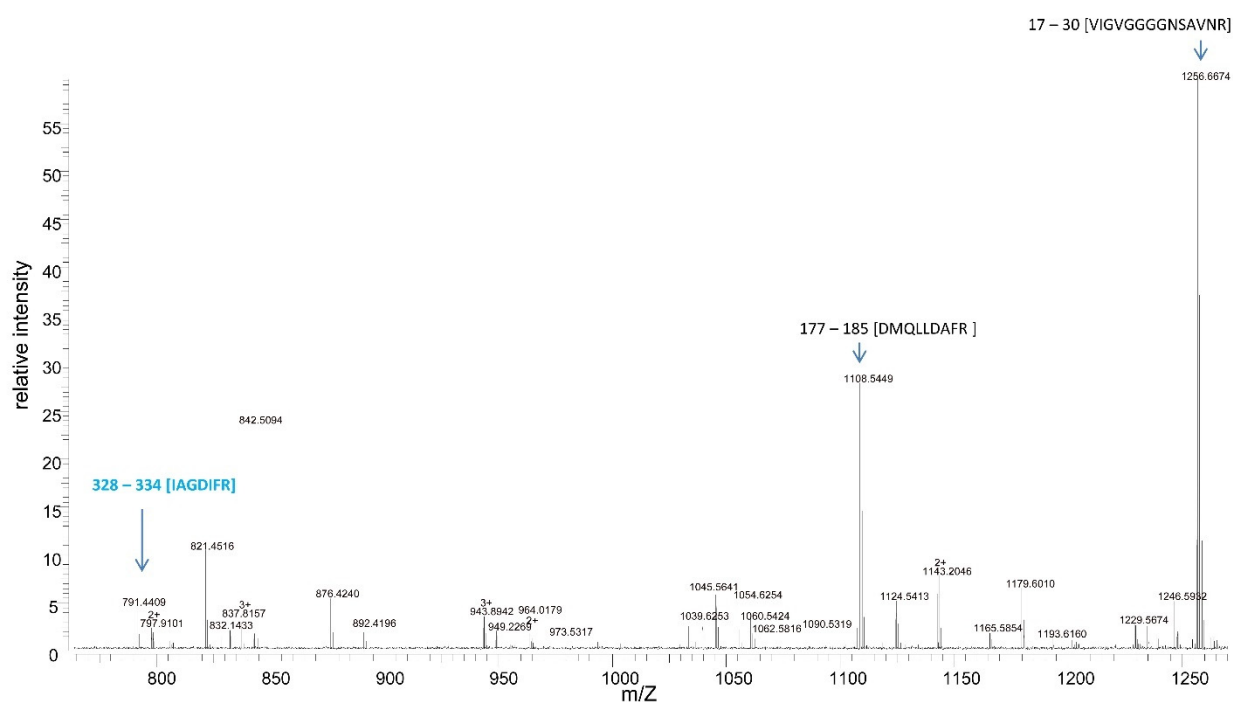

Spectrum of *A. laidlawii* FtsZ cleaved by a proteolysin.

The spectra are shown with the selected mass range, in which the peaks of the cleaved protein disappear from the spectrum or the intensity of which is greatly reduced. Their corresponding peptides are marked in blue.

**Supplementary S3.** Peak intensities determined by mass spectrometry.

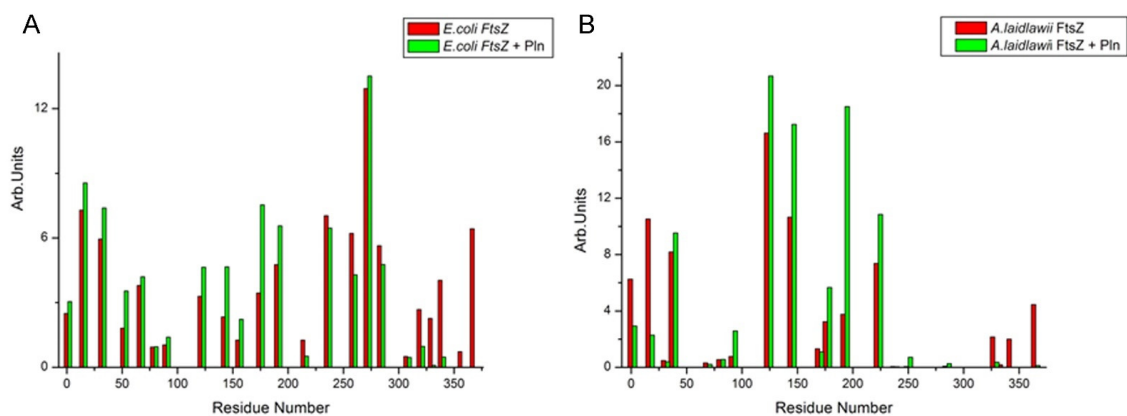

The abscissa shows the first amino acids numbers of the found peptides. The y-axis shows the average peak intensities corresponding to the found peptides in the spectra of the uncleaved FtsZ (red) and in the spectra of the FtsZ cleaved by a protealysin (green).

**Supplementary S4. Peptides detected by mass spectrometry.**

|     |                             |                             |                     |                             |                    |
|-----|-----------------------------|-----------------------------|---------------------|-----------------------------|--------------------|
| 1   | <u>M</u> FEP <u>M</u> ELTND | AVIK <u>V</u> IGVGG         | GGGNAVEH <u>M</u> V | <u>R</u> ERIEGVEFF          | AVNTDAQAL <u>R</u> |
| 51  | <u>K</u> TAVGQTIQI          | GSGIT <u>K</u> GLGA         | GANPEVGR <u>N</u> A | ADEDR <u>D</u> ALRA         | ALEGADMVFI         |
| 101 | AAGMGGGTGT                  | GAAPVVAEVA                  | <u>K</u> DLGILTAV   | VT <u>K</u> PFNFEG <u>K</u> | <u>K</u> RMAFAEQGI |
| 151 | TELS <u>K</u> HVDSL         | ITIPND <u>K</u> LL <u>K</u> | VLGR <u>G</u> ISLLD | AFGAANDV <u>L</u> K         | GAVQGIAELI         |
| 201 | TRPGLMNVD <u>F</u>          | ADV <u>R</u> TVMSEM         | GYAMMGSGVA          | SGEDRAEEAA                  | EMAISSPLLE         |
| 251 | DIDLSGARGV                  | LVNITAGFDL                  | <u>R</u> LDEFETVGN  | TIRAFASDNA                  | TVVIGTSLDP         |
| 301 | DMNDEL <u>R</u> VTV         | VATGIGMD <u>K</u> R         | PEITLVTN <u>K</u> Q | VQQPVMD <u>R</u> YQ         | QHGMAPLTQE         |
| 351 | QKPVA <u>K</u> VVND         | NAPQTAKEPD                  | YLDIPAFL <u>R</u> K | QAD                         |                    |

Uncleaved *E. coli* FtsZ.

|     |                             |                             |                     |                                      |                             |
|-----|-----------------------------|-----------------------------|---------------------|--------------------------------------|-----------------------------|
| 1   | <u>M</u> FEP <u>M</u> ELTND | AVIK <u>V</u> IGVGG         | GGGNAVEH <u>M</u> V | <u>R</u> ERIEGVEFF                   | AVNTDAQAL <u>R</u>          |
| 51  | <u>K</u> TAVGQTIQI          | GSGIT <u>K</u> GLGA         | GANPEVGR <u>N</u> A | ADEDR <u>D</u> ALRA                  | ALEGADMVFI                  |
| 10  | AAGMGGGTGT                  | GAAPVVAEVA                  | <u>K</u> DLGILTAV   | VT <u>K</u> PFNFEG <u>K</u>          | <u>K</u> RMAFAEQGI          |
| 151 | TELS <u>K</u> HVDSL         | ITIPND <u>K</u> LL <u>K</u> | VLGR <u>G</u> ISLLD | AFGAANDV <u>L</u> K                  | GAVQGIAELI                  |
| 201 | TRPGLMNVD <u>F</u>          | ADV <u>R</u> TVMSEM         | GYAMMGSGVA          | SGEDRAEEAA                           | EMAISSPLLE                  |
| 251 | DIDLSGARGV                  | LVNITAGFDL                  | <u>R</u> LDEFETVGN  | TIRAFASDNA                           | TVVIGTSLDP                  |
| 301 | DMNDEL <u>R</u> VTV         | VATGIGMD <u>K</u> R         | PEITLVTN <u>K</u> Q | <u>V</u> QQP <u>V</u> M <u>D</u> RYQ | <u>Q</u> HGM <u>A</u> PLTQE |
| 351 | <u>Q</u> KPVA <u>K</u> VVND | NAPQTAKEPD                  | YLDIPAFL <u>R</u> K | QAD                                  |                             |

*E. coli* FtsZ cleaved by a protealysin.

|     |                     |                                               |                             |                              |                              |
|-----|---------------------|-----------------------------------------------|-----------------------------|------------------------------|------------------------------|
| 1   | <u>M</u> VFGFNDEFN  | QKPVI <u>K</u> VIGV                           | GGGGNSAV <u>N</u> R         | MIENDV <u>R</u> GV           | YVAMNTDAQV                   |
| 51  | <u>L</u> KVSKADERI  | QLGK <u>K</u> L <u>R</u> GL                   | GAGAKPAIG <u>K</u>          | QAALESEDDI                   | <u>R</u> EVLSADAMV           |
| 101 | FITAGMGGGT          | GTGAAPV <u>V</u> AR                           | IA <u>K</u> ELGVLT          | GIVTKPFVFE                   | G <u>P</u> L <u>R</u> MQHAI  |
| 151 | GLEELKPNVD          | TLVIPNERL                                     | FSIAD <u>R</u> DMQL         | LDA <u>F</u> RESD <u>K</u> V | L <u>R</u> QGVQIAE           |
| 201 | IIAVPGMINV          | DFADV <u>R</u> TVME                           | N <u>K</u> GTALMGIG         | MASGEN <u>R</u> AIE          | AAR <u>K</u> AIH <u>S</u> KL |
| 251 | LEVSIDGATD          | AIVNISSGAE                                    | VT <u>L</u> FEIEAAL         | TEI <u>R</u> NATESD          | LNVIYGH <u>T</u> VS          |
| 301 | VDLEDEMIVT          | IVATGYEL <u>R</u> A                           | <u>K</u> GNEVE <u>K</u> IAG | DIFRNNSTQQ                   | V <u>K</u> ITDTGLEP          |
| 351 | LNN <u>K</u> EASGED | <u>T</u> K <u>K</u> R <u>T</u> LP <u>S</u> WL | <u>H</u> R <u>K</u>         |                              |                              |

Uncleaved *A. laidlawii* FtsZ.

|     |                     |                                               |                             |                              |                                      |
|-----|---------------------|-----------------------------------------------|-----------------------------|------------------------------|--------------------------------------|
| 1   | <u>M</u> VFGFNDEFN  | QKPVI <u>K</u> VIGV                           | GGGGNSAV <u>N</u> R         | MIENDV <u>R</u> GV           | YVAMNTDAQV                           |
| 51  | <u>L</u> KVSKADERI  | QLGK <u>K</u> L <u>R</u> GL                   | GAGAKPAIG <u>K</u>          | QAALESEDDI                   | <u>R</u> EVLSADAMV                   |
| 101 | FITAGMGGGT          | GTGAAPV <u>V</u> AR                           | IA <u>K</u> ELGVLT          | GIVTKPFVFE                   | G <u>P</u> L <u>R</u> MQHAI          |
| 151 | GLEELKPNVD          | TLVIPNERL                                     | FSIAD <u>R</u> DMQL         | LDA <u>F</u> RESD <u>K</u> V | L <u>R</u> QGVQIAE                   |
| 201 | IIAVPGMINV          | DFADV <u>R</u> TVME                           | N <u>K</u> GTALMGIG         | MASGEN <u>R</u> AIE          | AAR <u>K</u> AIH <u>S</u> KL         |
| 251 | LEVSIDGATD          | AIVNISSGAE                                    | VT <u>L</u> FEIEAAL         | TEI <u>R</u> NATESD          | LNVIYGH <u>T</u> VS                  |
| 301 | VDLEDEMIVT          | IVATGYEL <u>R</u> A                           | <u>K</u> GNEVE <u>K</u> IAG | D <u>I</u> FRNNSTQQ          | <u>V</u> K <u>I</u> TD <u>T</u> GLEP |
| 351 | LNN <u>K</u> EASGED | <u>T</u> K <u>K</u> R <u>T</u> LP <u>S</u> WL | <u>H</u> R <u>K</u>         |                              |                                      |

*A. laidlawii* FtsZ cleaved by a protealysin.

Peptides found by mass spectrometry are highlighted in color. Underlining indicates the amino acids after which the protein is cleaved by trypsin. Blue indicate peptides whose peak intensity in the spectrum of the cleaved FtsZ is 10 or more times lower than the intensity of these peaks in the spectrum of the uncleaved protein (Supplementary S2, S3). Examples of amino acids before which protealysin can cleave protein are highlighted in yellow [19].
